# Supplementary material
Source: PubMed Central journal article supplement (PMC3708649)

```

ERMP1      MEWGESAAVRRHRVGVVERREGAAAAPPPEAREAQEPLVDGCGSGGRTRKRSPGGSGGA 60
FXNA      MEWSESAAVRRHRGTAEERREGQAAASHPQREASAQE----DARGGMRMRGRTE--SGGE 54
Ybr074    MKLKSVFRSLVKYRKTN----- 17
          *: *  :* :*:

ERMP1      SRGAGTGLSEVRAALGLALYLIALRTLVLQSLQQLVLRGAAGHRGEFDALQARDYLEHIT 120
FXNA      SRGAKTALSEARTALALALYLALRALVQLSLQRLVLSRTSGLQGEFDAQARVYLEHIT 114
Ybr074    -----L_SLLLLITYSIITLLYIFDHERYKLNLPKEDEHPEFNDLLETAWGDLQII 67
          * : : : : * : : . : * * * : : * : :

ERMP1      SIGPRTTGSPENEILTVHYLLEQIKLIEVQSNLHKISVDVQRPTGSFSDIFLGGFTSY- 179
FXNA      AIGPRTTGSAEENEILTVQYLLEQITLIEEQSNLHRISVDVQRPTGSFSDIFLGGFTSY- 173
Ybr074    TASHPHYTSKENDKVHDYLLKRVLEITGNSSFASVSDDKESERSILFQQQDPFNSESSRF 127
          : . . . * * : : : * . : : * : : : * . : : * . : : * : :

ERMP1      ---YDNITNVVVKLEPRDGAQHAVLANCHFDVSVANSPGASDDAVSCSVMLEVLRLVLTSS 236
FXNA      ---YDNITNVVVKLEPQDGAKYAVLANCHFDVSVANSPGASDDAVSCAVMLEVLRLVMAASP 230
Ybr074    RVTYFESSNILLVLEGNPEEEGLLSAHFSDVPTGYGATDDGMGVVSLLANLKYHKHHR 187
          * : : * : * * * : : : . : * . * * * . . . * * * : : * * :

ERMP1      EALHHAIVFLFNGAEEENVLQASHGFIHQHPWASLIRAFINLEAAGVGGKELVFQTGPENP 296
FXNA      EPLQHAVVFLFNGAEEENVLQASHGFIHQHPWASLIRAFINLEAAGVGGKELVFQTGPENP 290
Ybr074    P--NRTLIFNFNNNEEFGLLGASTYFDHS--WSNLTKYVINLEGTGAGGKAVLFRTS-DTS 243
          : : : : * * . * * * . : : : : * : * . * * * . * * * : * * : . .

ERMP1      WLWQAYVSAAKHPFASVVAQEVFQSGIIPSDTDFRIYRDFGNIPGIDLAFIENGYIYHTK 356
FXNA      WLWQAYVSAAKHPFASVVAQEVFQSGIIPSDTDFRIYRDFGNIPGIDLAFIENGYIYHTK 350
Ybr074    TARIYQQSVKENPFGNSIYQQGFYSRYRSETDYKIYEENG-MRGWDVAFYKPRNLYHTI 302
          * . : : * * . : : * * * : : * * * : * * * : * * * : * * * : * * *

ERMP1      YDTADRILTDSIQRAGDNILAVLKLHATSMDLAAASK----YRHGNMVFVDV----- 404
FXNA      YDTADRILIDSIQRAGDNILAVLKYLATSDMLASSE----YRHGSMVFVDV----- 398
Ybr074    KDSIQYTSKASLWHMLHTSLQLSAYVASNSLDTADQTPACYFDFIQLKFFVISAKTLFYW 362
          * : : * : : . * : : : * : : : : . : : : * * :

ERMP1      -----LGLFVIAIYPSRIGSIINYMVMVGVVLYLGKKFLQPKHKTGNKDFLC 452
FXNA      -----LGLLVIAIYPSRVGSIINYMVMMAVVLYLGRKLLRPNHSNSNYVDFLC 446
Ybr074    NCIFLLVSPVVAIGLYLISRDRMTWKSYSWLSWTRFPLSLAAGIIVQKLFNSNDIIRSNPL 422
          : * * : * : . : : . * * . : : : . : : .

ERMP1      GLGITLISWFTSLVTVLIIAVFISLIGQSLSWYNHFYVSVCLYGTATVAKIILIHHTLAKR 512
FXNA      GLGITLISWFTSLVTVLIIAVFVSLIGQSLSWYNFYIYAVCLYGTATVAKIILIHHTLAKR 506
Ybr074    TFSRNYFWPISAFFTQVIFTSYVLIINCSNFPEPCADMKSLSIIELFILWTLILLTSLKL 482
          : . . : : : * * : * : : : : : : : : : : : : : * * * *

ERMP1      FYYMN-ASAQYLGEVFFDISLFVHCCFLVTLTYQGLCSAFISAVWVAFPLLTKLVCHKDF 571
FXNA      FYYVN-ASDLYLGELEFFDTSLFVHCGFLVALTAQGCFSAFMSAVWVAFPLLTKLVCHKDF 565
Ybr074    YSSDYRYTGLYPLSIFLLSTIAAILRLALALGMRTRKRLGRECRDHHSNYSSSHQIDM 542
          : : : * . : * * * * . : * : * : : : : : : : : : : * :

ERMP1      KQHG----- 575
FXNA      KKHG----- 569
Ybr074    ERDQENLEQPQDQLTSSQDQASIQDDNVSTTSAGPSHNVEDHGMDSQQHDERVPL 602
          : : *

ERMP1      -----AQQKFIAFYLLGMFIPYLYALYLIWAVFEMFTPILG-- 611
FXNA      -----AKGRFIALYLLGMFIPYLYGLYLIWAVFEMFTPILG-- 605
Ybr074    LKGSNSMEEGLSTRENSLKLEYTDYAWIIQFLLIVPIPSFILFNSVDVIMDALNHTVQEG 662
          : . : * : * * : * * : : : : : : : : : : : :

ERMP1      -RSGSEIPPDVVLASILAGCTMILSSYFINFIYLAKSTKKTMLTTLVCAITFLLVCSGT 670
FXNA      -RSGSEIPPDVVLASILLAVCVMLSSYFITFIYLVNSTKKTILTLLVCAVTFLLVCSGA 664
Ybr074    SKATFDVLRFGMVGSLIALPLPFFYKVNYSITSLTALLFLISASKTLLVHFFTFNSNPL 722
          : : : : : * * * : : * : * : : : : : : : : : . .

ERMP1      FFPYSSNPANPK-----PKRVFLQHMTRTFHDLEGNVAVKRDSGIWINGFYDTGIS 720
FXNA      FFPYSSNPDSPK-----PKRVFLQHVSRTFHNLGEGSVKRDSGIWINGFYDTGIS 714
Ybr074    KVRFSQNIIDLSQNAASVHVLGREGNFKPMLQDLPSIKYSSTHINCTSVTNGMELCMYD 782
          . * * . : : : * * : : : : : : : : . * * : .

ERMP1      HITPHIPEIN--DSIRAHCEENAPLCGFWYLPVHFLIRKNWYLPAPEVSPRNPFFHRLI 778
FXNA      HVTPHIPEIN--DTIRAHCEENAPLCGFWYLPVHFLIRKNWYLPAPEISPRNPAHFRVL 772
Ybr074    GMQPNLLSTNGNTNISSMVKVHVLHNNRNSTERSPEYPIVAEALLLEVKENRACTLTFESR 842
          : * : . * . * : : : . : : : : * : : . . * .

ERMP1      SKEQTPWDSIKLTFEATGPSHMSFYVRAHKGST----LSQWSLGNPTVTSKGGDYFVFY 834
FXNA      SKEKMPWDSIKLTFEATGPSHMSFYVVRTHKGST----LSQWSLGNPIPVTSRGGDYFVFY 828
Ybr074    HQAKSPVREITVYQKNSAPQKANITKTIKSASGINELQLHKLDFDQETHYHIGVQWFPKL 902
          : : * . * : : : . : : : : * . * : : . * * * : * * *

ERMP1      SHGLQASAWQFVIEVQVSEEHPEGMVTVAAIAHYLSGEDKRSQDLALKEKFP-DWTFPS 893
FXNA      SHGLQASAWQFVIEVQVSEEQPEGMTVAIAAHYLSGENKRSSQLDALKEKFP-DWSFPS 887
Ybr074    LFDGNVEDDKLGTKDELVSISICYWGEYDSESVVNGTAVRKIPAFDELINYAPLSFSTN 962
          : . . . : : : * * . : : : : : : : * * : * . : * * .

ERMP1      ---AWVCTYDLFVF 904
FXNA      ---AWVSTYSLEVF 898
Ybr074    EQKGLVIVKDAIL 976
          . * . . : :

```

| Proteinase K | - |    |    | + |    |    |
|--------------|---|----|----|---|----|----|
| Time (min)   | 0 | 10 | 20 | 0 | 10 | 20 |

230 kDa —  
 130 kDa —  
 95 kDa —

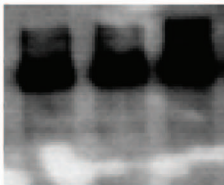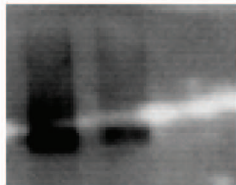

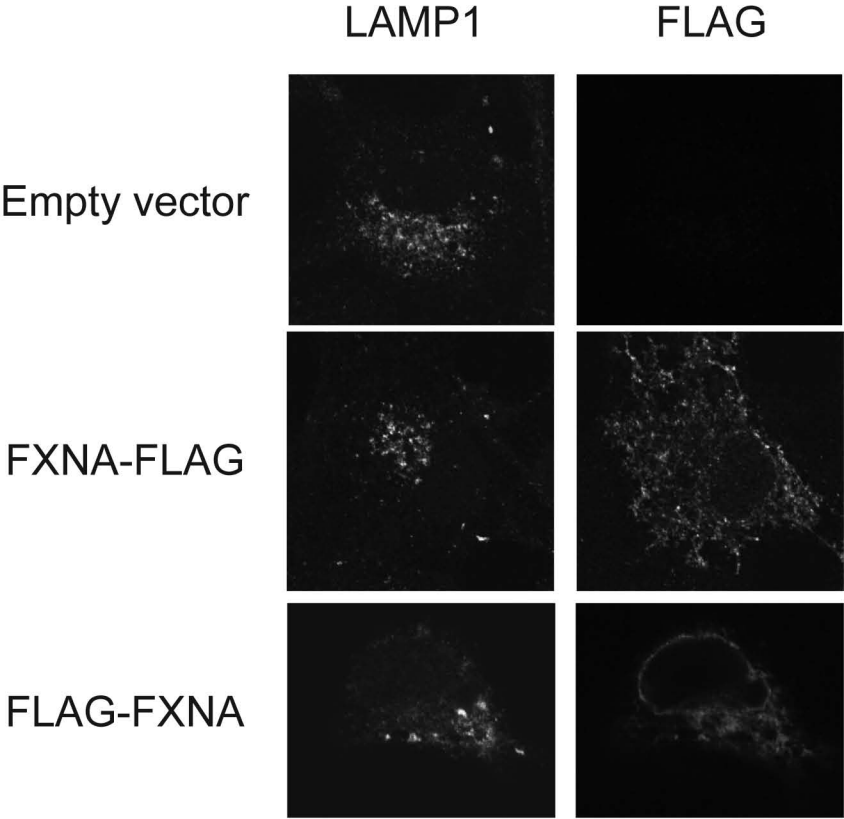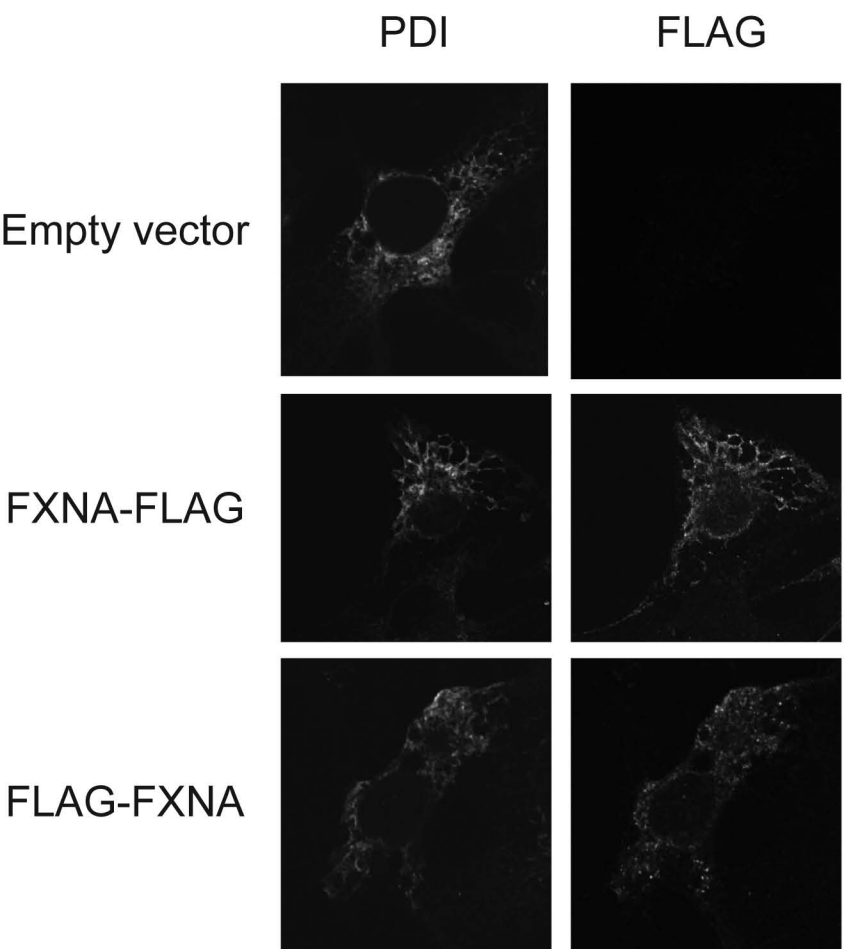

DIC

Ybr074

Uninduced Induced

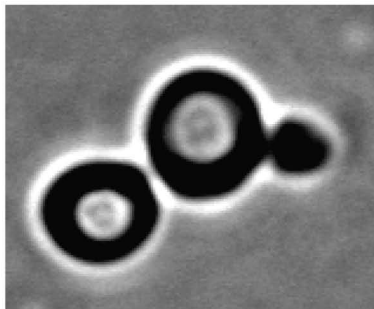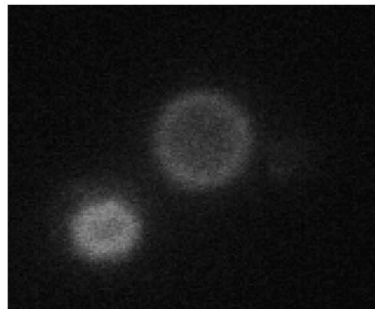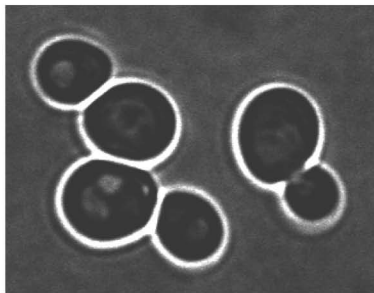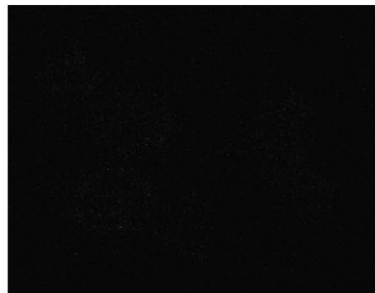

Supplement: NIHMS484147-supplement-Supp_Fig_S1-S4.pdf [file NIHMS484147-supplement-Supp_Fig_S1-S4.pdf]
